# Supplementary material
Source: publisher figshare collection journal article supplement (https://tandf.figshare.com/ndownloader/files/7726711)
Supplement: Supplementary file 1 [file 7726711]

## ***Escherichia coli* biofilm response to salicylic acid**

C. Cattò, G. Grazioso, S. Dell'Orto, A. Gelain, S. Villa, V. Marzano, A. Vitali, F. Villa, F.

Cappitelli\*, F. Forlani

## **SUPPLEMENTAL MATERIAL**

### ***Synthesis of 4-acetamidosalicylic acid***

4-acetamidosalicylic acid (4-AcASA) was synthesized as reported in the following procedure. A suspension of 4-ASA (1 g, 6.53 mmol) in ethanol (10 mL) and acetic anhydride (0.62 mL, 6.58 mmol) was stirred at 40 °C for 30 min and then allowed to cool at room temperature. The mixture was then concentrated *in vacuo* and extracted with ethyl acetate (3 x 2 mL). The organic phase was dried over Na<sub>2</sub>SO<sub>4</sub>, filtered and then concentrated under reduced pressure. The crude product was purified by flash column chromatography using dichloromethane/methanol (9:1) as eluent to afford the final product 4-AcASA. Yield: 48 %. Brown solid. TLC: DCM/MeOH (9:1) R<sub>f</sub> = 0.52. M.p.: 230-231 °C (decomp). <sup>1</sup>H NMR (DMSO-d<sub>6</sub>): 6.40 (dd, 1H, ArH, J=1.2, J=8.1), 6.87 (d, 1H, ArH, J=8.1), 7.02 (t, 1H, ArH, J=8.1), 7.16 (s, 1H, OH), 9.30 (s, 1H, NH), 9.76 (s, 1H, COOH). <sup>13</sup>C NMR (CD<sub>3</sub>OD): 22.7, 107.2, 111.0, 129.3, 139.8, 157.7, 170.4.

***Planktonic grow of 4-ASA and 4-AcASA***

| <b>Cmpd</b>    | <b>Concentration (μM)</b> | <b>A<sub>600</sub> ml<sup>-1</sup></b> |
|----------------|---------------------------|----------------------------------------|
| <b>4-ASA</b>   | <b>0</b>                  | 0.031±0.003 <sup>a</sup>               |
|                | <b>0.183</b>              | 0.030±0.004 <sup>a</sup>               |
|                | <b>1.83</b>               | 0.032±0.006 <sup>a</sup>               |
|                | <b>18.3</b>               | 0.029±0.002 <sup>a</sup>               |
|                | <b>183</b>                | 0.027±0.004 <sup>a</sup>               |
|                | <b>1,830</b>              | 0.029±0.003 <sup>a</sup>               |
|                | <b>1,830 (glucose)</b>    | 0.121±0.007 <sup>b</sup>               |
|                | <b>3,000 (glucose)</b>    | 0.172±0.011 <sup>c</sup>               |
| <b>4-AcASA</b> | <b>0</b>                  | 0.031±0.003 <sup>a</sup>               |
|                | <b>0.183</b>              | 0.029±0.006 <sup>a</sup>               |
|                | <b>1.83</b>               | 0.032±0.006 <sup>a</sup>               |
|                | <b>18.3</b>               | 0.028±0.003 <sup>a</sup>               |
|                | <b>183</b>                | 0.025±0.004 <sup>a</sup>               |
|                | <b>1,830</b>              | 0.029±0.004 <sup>a</sup>               |
|                | <b>1,830 (glucose)</b>    | 0.121±0.007 <sup>b</sup>               |
|                | <b>3,000 (glucose)</b>    | 0.172±0.011 <sup>c</sup>               |

**Table S1. Planktonic growth in the presence of 4-ASA and 4-AcASA as the sole carbon and energy source.** Data represent the mean ± standard deviation of three independent measurements. Different superscript letters indicate statistically significant differences (Tukey's HSD,  $p \leq 0.001$ ) between the means of three independent replicates. The positive controls were set up with the mineral medium supplemented with glucose at both 1,830 μM and 3,000 μM.

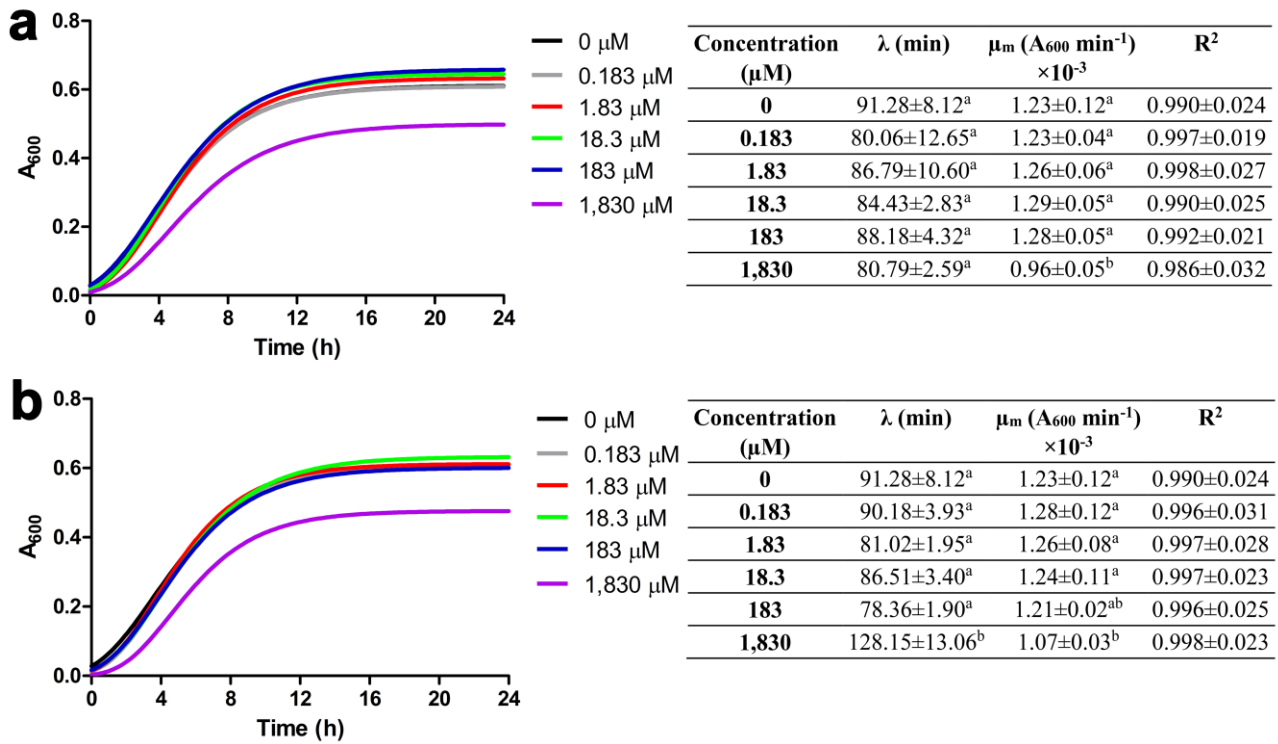

**Figure S1. Planktonic growth without and with 4-ASA and 4-AcASA.**  $A_{600}$ -based growth curve of *E. coli* without and with 4-ASA (a) and 4-AcASA (b) at different concentrations (left) and growth parameters lag time length ( $\lambda$ ), maximum specific growth rate ( $\mu_m$ ) and the Goodness of Fit ( $R^2$ ) obtained by the Gompertz model (right). Data represent the mean  $\pm$  standard deviation of three independent measurements. Different superscript letters indicate statistically significant differences (Tukey's HSD,  $p \leq 0.001$ ) between the means of three independent replicates.
